# Supplementary material for: DNA-assisted photoinduced charge transfer between a cationic poly(phenylene vinylene) and a cationic fullerene
Source: Royal Society of Chemistry journal article supplement (doi:10.1039/c5cp01309g), 2015-01-01
Supplement: c5cp01309g1.pdf [file c5cp01309g1.pdf]

## Supplementary Information

### DNA-assisted photoinduced charge transfer between a cationic poly(phenylene vinylene) and a cationic fullerene

Youngil Park<sup>1</sup>, Zhongwei Liu<sup>2,3</sup>, Prahlad K. Routh<sup>2,3</sup>, Cheng-Yu Kuo<sup>1</sup>, Young-Shin Park<sup>1</sup>, Hsinhan Tsai<sup>1</sup>, Jennifer S. Martinez<sup>4</sup>, Andrew P. Shreve<sup>5</sup>, Mircea Cotlet<sup>2,3,\*</sup> and Hsing-Lin Wang<sup>1\*</sup>

<sup>1</sup>Chemistry Division, Los Alamos National Laboratory, Los Alamos, NM 87545; <sup>2</sup>Center for Functional Nanomaterials, Brookhaven National Laboratory, Upton, NY 11793; <sup>3</sup>Materials Science Department, Stony Brook University, Stony Brook, NY 11790; <sup>4</sup>Center for Integrated Technologies and Institute for Materials Science, Los Alamos National Laboratory, Los Alamos, NM 87545; <sup>5</sup>University of New Mexico, Albuquerque, NM 87131.

#### Details on spectroscopic measurements

UV-Vis spectra were measured with a Perkin Elmer Lambda 20 spectrophotometer, photoluminescence spectra with a Varian Cary Eclipse fluorimeter, dynamic light scattering with a Malvern Zetasizer. Fluorescence decays were measured by the time-correlated single photon counting (TCSPC) method using a Picoquant FluoTime 200 spectrometer combined with a solid state femtosecond laser system delivering 460nm pulses (85 fs pulse width at 8MHz), with an overall instrumental response function of 45 ps. A complete description of the system can be found in ref<sup>1</sup>. PL lifetimes were estimated by reconvolution of the measured PL decay with the instrumental response function and using a multiexponential function according to:

$$\tau_{ave} = (a_i \times \tau_i) / \sum_i (a_i \tau_i) \quad (s1)$$

#### Proposed modified model for the quenching sphere of action

For nonlinear SV curves like that exhibited by C-PPV:ssDNA:C-C<sub>60</sub> shown in Fig.3b and accompanied by nonlinear  $\tau_{PL}(D)/\tau_{PL}(DA)$  vs [A] dependency (Fig.3b, red square and line, main text), the quenching sphere of action is an appropriate model<sup>2</sup>. This model assumes that there is no static quenching, instead an apparent static quenching component is attributed to the presence of the quencher near the emitter in a volume (sphere of action) where the probability of quenching following optical excitation is unity<sup>2c, 3</sup>. A general equation can be written for this model as follows

$$PL(D)/PL(DA) = \left[ (1 - f_a) + \frac{f_a}{(1+k_D) \times \exp(V[A])} \right]^{-1} \quad (s2)$$

with  $f_a = PL^a(D)/[PL^a(D) + PL^b(D)]$  representing the fraction of emitters available for quenching and  $V$ , the sphere of action volume (see SI for details on derivation of eq.4). For a SV curve exhibiting upward curvature,  $f_a = 1$  (all emitters are available to be quenched) and eq. s2 becomes the classic formula describing the sphere of action model<sup>3a, 3c</sup>

$$PL(D)/PL(DA) = (1 + k_D) \times \exp(V[A]) \quad (s3)$$

We analyzed the SV curve from Fig.3b by splitting it according to the acceptor concentration range in low (0-0.4  $\mu\text{M}$ ) and intermediate (2) (0.5-0.8 $\mu\text{M}$ ) concentration regimes exhibiting upward curvature and a high concentration regime (3) (0.9-1.6 $\mu\text{M}$ ) with downward curvature (Fig.S5, SI). Distinction between low (1) and intermediate (2) regimes was done based on the  $\tau_{\text{PL(D)}}/\tau_{\text{PL(DA)}}$  vs [Acceptor] dependency, that is, linear vs nonlinear, respectively. For the first two regimes, we assume  $f_a = 1$  (all emitters available for quenching), and use eq. s3 to retrieve  $k_D(1)=3.3 \times 10^{-5} \mu\text{M}^{-1}$  and  $V(1)=1.05 \mu\text{M}^{-1}$  and  $k_D(2)=3.3 \times 10^{-5} \mu\text{M}^{-1}$  and  $V(2)=1.49 \mu\text{M}^{-1}$ , suggesting radii for the sphere of action of  $r(1)=75\text{nm}$  and  $r(2)=84\text{nm}$ , and very little or no dynamic quenching. For the high concentration regime the SV curve fitted with eq s2 provides  $f_a(3)=0.9$ ,  $k_D(3)=0.46 \mu\text{M}^{-1}$  and  $V(3)=2.07 \mu\text{M}^{-1}$  which in turn provides a sphere of action radius of 94nm, values which suggest that at high acceptor concentration charge transfer is mostly dynamic in nature.

Eq.s2 can be derived according to ref <sup>4</sup>, where the fractional accessibility, or the percentage of emitters available for quenching can be defined as

$$f_a = \frac{I_0^a}{I_0^a + I_0^b} = I_0^a / I^0 \quad (\text{s4})$$

with

$$I^0 = I_0^a + I_0^b \quad (\text{s3}) \quad (\text{s5})$$

the total PL intensity in the absence of the quencher, composed of  $I_0^a$  as the PL intensity from emitters available (accessible) for quenching, and  $I_0^b$  as the PL intensity from emitters inaccessible for quenching. According to the quenching sphere of action model, the PL intensity in the presence of a quencher Q can be written<sup>4</sup>

$$I = \frac{I_0^a}{(1 + k_{SV}[Q])\exp(v[Q])} + I_0^b \quad (\text{s5})$$

Combining eqs.s4-6 we obtain

$$\frac{I}{I_0} = (1 - f_a) + f_a / [(1 + k_{SV}[Q])\exp(v[Q])] \quad (\text{s6})$$

which is the equivalent of eq.s2

1. Xu, Z.; Tsai, H.; Wang, H.-L.; Cotlet, M., Solvent Polarity Effect on Chain Conformation, Film Morphology, and Optical Properties of a Water-Soluble Conjugated Polymer. *The Journal of Physical Chemistry B* **2010**, *114* (36), 11746-11752.
2. (a) Selmarten, D.; Jones, M.; Rumbles, G.; Yu, P. R.; Nedeljkovic, J.; Shaheen, S., Quenching of semiconductor quantum dot photoluminescence by a pi-conjugated polymer. *Journal of Physical Chemistry B* **2005**, *109* (33), 15927-15932; (b) Lee, P. P. S.; Ngai, T.; Huang, J. D.; Wu, C.; Fong, W. P.; Ng, D. K. P., Synthesis, characterization, biodegradation, and in vitro photodynamic activities of silicon(IV) phthalocyanines conjugated axially with poly(epsilon-caprolactone). *Macromolecules* **2003**, *36* (20), 7527-7533; (c) Wang, D. L.; Wang, J.; Moses, D.; Bazan, G. C.; Heeger, A. J., Photoluminescence quenching of conjugated macromolecules by bipyridinium derivatives in aqueous media: Charge dependence. *Langmuir* **2001**, *17* (4), 1262-1266.

3. (a) Lakowicz, J. R., *Principles of Fluorescence Spectroscopy*. 2004; Vol. 2nd Edition, p 238-264; (b) Campbell, K.; Zappas, A.; Bunz, U.; Thio, Y. S.; Bucknall, D. G., Fluorescence quenching of a poly(para-phenylene ethynylenes) by C-60 fullerenes. *Journal of Photochemistry and Photobiology a-Chemistry* **2012**, 249, 41-46; (c) Geddes, C. D., Optical halide sensing using fluorescence quenching: theory, simulations and applications - a review. *Measurement Science & Technology* **2001**, 12 (9), R53-R88.
4. Chris, D. G., Optical halide sensing using fluorescence quenching: theory, simulations and applications - a review. *Measurement Science and Technology* **2001**, 12 (9), R53.

### Supplementary Figures

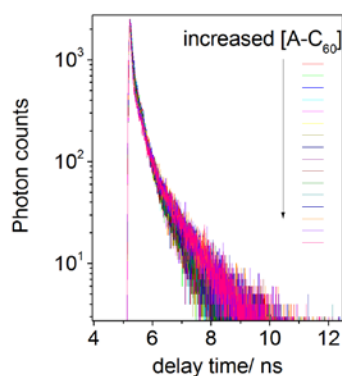

**Figure S1.** PL decays from C-PPV:A-C60 complex for various donor:acceptor molar ratios (defined in Fig.2b, main text). Arrow indicates increase in [A-C60]. PL excited at 460nm and detected at 580nm. C-PPV concentration was 0.3  $\mu\text{M}$ .

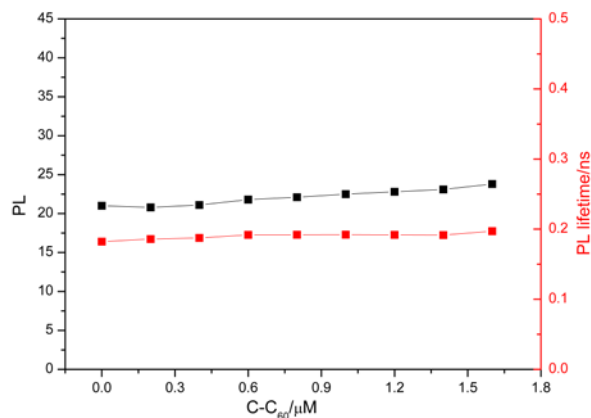

**Figure S2.** PL intensity (black squares and line) and PL lifetimes (red squares and line) of C-PPV vs added C-C<sub>60</sub>. C-PPV concentration was 0.3  $\mu\text{M}$ .

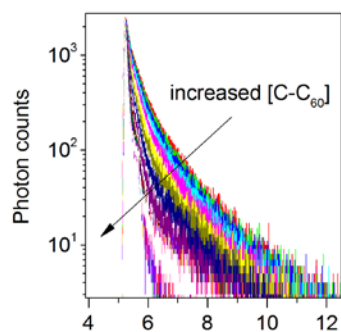

**Figure S3.** PL decays from C-PPV:ssDNA:C-C60 complex for various donor:acceptor molar ratios (defined in Fig.3b, main text), for a constant C:PPV:ssDNA molar ratio of 1:3. Arrow indicates increase in [C-C60]. PL excited at 460nm and detected at 580nm. C-PPV concentration was 0.3  $\mu$ M.

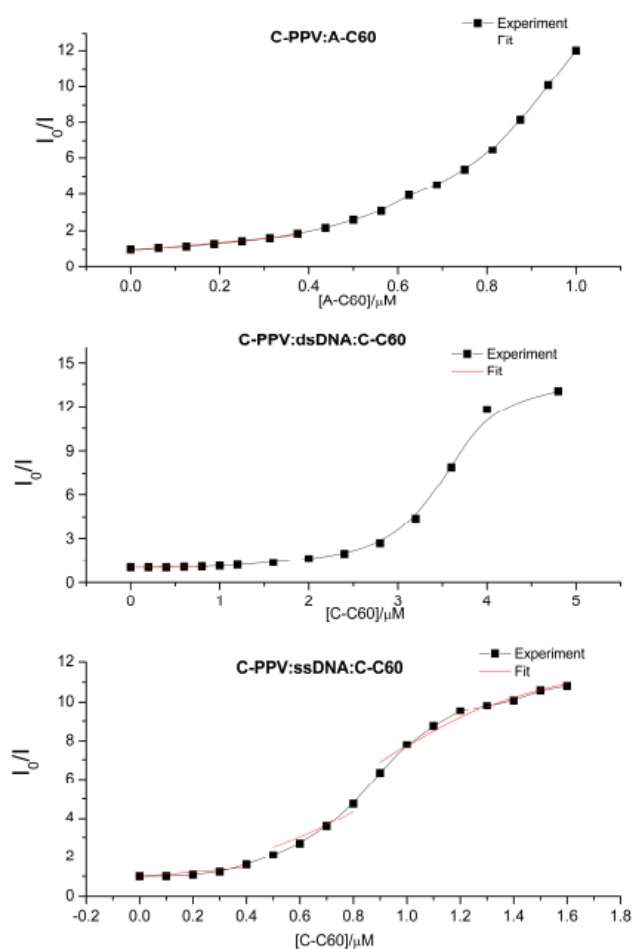

**Figure S4.** PL Stern-Volmer plot and fitting of (upper panel) C-PPV with increasing A-C60 concentration, C-PPV/dsDNA (middle panel) and C-PPV/ssDNA (lower) with increasing C-C60 concentration. Molar ratios for C-PPV:ssDNA and C-PPV:dsDNA were 1:3, in water and 1mM PBS, respectively. C-PPV concentration was 0.3  $\mu$ M.

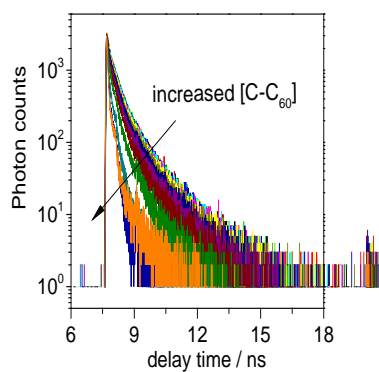

**Figure S5.** PL decays from C-PPV:dsDNA:C-C60 complex for various donor:acceptor molar ratios (defined in Fig.4b main text), for a constant C:PPV:dsDNA molar ratio of 1:3. PL excited at 460nm and detected at 580nm. C-PPV concentration was 0.3  $\mu\text{M}$ . Arrow indicates increase in [C-C60]

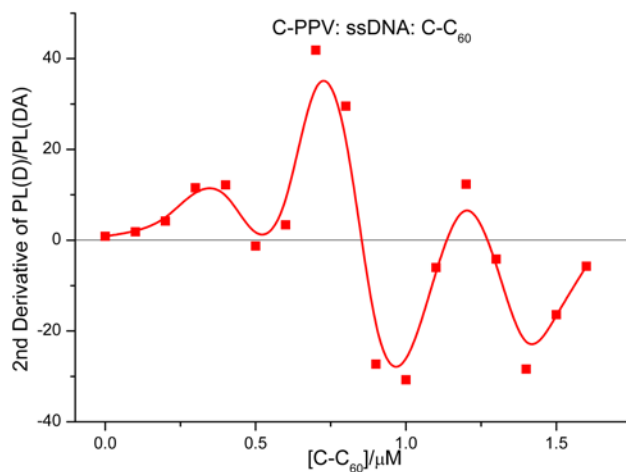

**Figure S6.** 2<sup>nd</sup> derivative of  $PL(D)/PL(DA)$  vs  $[C-C_{60}]$  dependency from Fig. 3b, main text, with an inflexion point at a C-C<sub>60</sub> concentration of about 0.8 $\mu\text{M}$ .

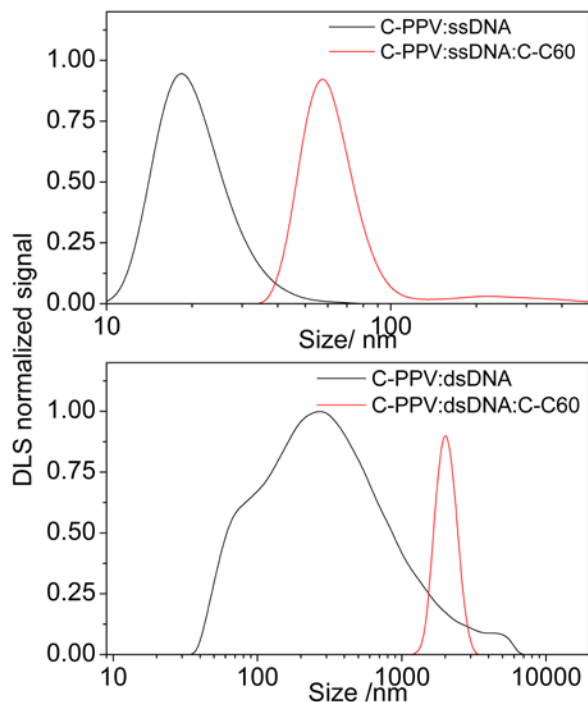

**Figure S7.** Dynamic light scattering measurements: upper panel, C-PPV:ssDNA (green line, water), C-PPV:ssDNA:C-C<sub>60</sub> (black line, water); lower panel, C-PPV:dsDNA (green line, 1 mM PBS), C-PPV:dsDNA:C-C<sub>60</sub> (black line, 1 mM PBS). Molar ratios: C-PPV:ssDNA, 1:3, C-PPV:ssDNA:C-C<sub>60</sub>, 1:3:5, C-PPV:dsDNA 1:3, C-PPV:dsDNA:C-C<sub>60</sub>, 1:3:15. C-PPV concentration was 0.3  $\mu$ M.

**Table S1:** Surface zeta potential measurements. C-PPV was 0.3 $\mu$ M. Molar ratio of C-PPV:A-C<sub>60</sub> was 1:3, C-PPV:ssDNA:C-C<sub>60</sub>=1:3:5; C-PPV:dsDNA:C-C<sub>60</sub>=1:3:15.

| complex                                  | Zeta potential/mV |
|------------------------------------------|-------------------|
| C-PPV( in water)                         | +37.2             |
| C-PPV (1mM PBS)                          | +11.0             |
| C-C <sub>60</sub> (in water)             | +44.0             |
| C-C <sub>60</sub> (1mM PBS)              | +20.0             |
| C-PPV: A-C <sub>60</sub> (water)         | +29.7             |
| C-PPV:ssDNA (in water)                   | -20.1             |
| C-PPV:ssDNA:C-C <sub>60</sub> (in water) | -5.19             |
| C-PPV:dsDNA (1mM PBS)                    | -33.7             |
| C-PPV:dsDNA:C-C <sub>60</sub> (1mM PBS)  | -16.6             |
